# Supplementary material
Source: HighWire-hosted journal article supplement (http://www.qdcxjkg.com/highwire/filestream/113153/field_highwire_adjunct_files/2/Supplementary_Table_2.pdf)
Supplement: Supplementary_Table_2.pdf [file Supplementary_Table_2.pdf]

| <b>Functional Category</b>              | <b>Mouse P-value*</b> | <b>Human P-value*</b> | <b>Mouse Fold Change</b> | <b>Human Fold Change</b> |
|-----------------------------------------|-----------------------|-----------------------|--------------------------|--------------------------|
| extracellular space                     | 5.13E-09              | 3.67E-19              | 2.83                     | 5.67                     |
| endopeptidase inhibitor activity        | 1.15E-11              | 2.33E-09              | 14.58                    | 15.21                    |
| enzyme inhibitor activity               | 3.73E-13              | 3.27E-07              | 12.47                    | 9.02                     |
| protease inhibitor activity             | 1.34E-11              | 2.47E-09              | 14.40                    | 15.11                    |
| cysteine protease inhibitor activity    | 2.70E-06              | 3.60E-04              | 22.70                    | 21.43                    |
| serine-type protease inhibitor activity | 7.33E-08              | 8.00E-06              | 11.70                    | 12.50                    |
| enzyme regulator activity               | 1.05E-07              | 9.72E-04              | 4.93                     | 3.52                     |
| defense response                        | 8.48E-04              | 9.79E-11              | 2.53                     | 4.29                     |
| response to biotic stimulus             | 1.15E-03              | 2.48E-10              | 2.46                     | 4.11                     |
| immune response                         | 6.41E-05              | 7.30E-11              | 3.18                     | 4.56                     |
| innate immune response                  | 2.70E-04              | 3.55E-04              | 15.75                    | 14.65                    |
| humoral immune response                 | 3.95E-03              | 1.57E-04              | 5.68                     | 8.53                     |
| complement activation                   | 1.28E-04              | 3.05E-05              | 19.05                    | 27.32                    |
| complement classical pathway            | >0.05                 | 3.34E-04              | NS                       | 28.88                    |
| complement alternative pathway          | 1.57E-03              | >0.05                 | 49.14                    | NS                       |
| response to stress                      | 8.30E-10              | 2.62E-04              | 4.02                     | 2.90                     |
| inflammatory response                   | 8.26E-09              | 4.28E-05              | 7.26                     | 6.15                     |
| acute-phase response                    | 5.01E-04              | 2.01E-06              | 25.20                    | 28.21                    |
| response to wounding                    | 1.22E-03              | 1.39E-04              | 3.77                     | 5.04                     |
| blood coagulation                       | 3.60E-03              | 1.05E-03              | 12.85                    | 10.99                    |
| antigen binding                         | >0.05                 | 2.98E-11              | NS                       | 7.81                     |
| high-density lipoprotein                | >0.05                 | 2.85E-04              | NS                       | 111.98                   |
| heparin binding                         | >0.05                 | 5.74E-04              | NS                       | 10.53                    |
| carbohydrate binding                    | >0.05                 | 5.17E-04              | NS                       | 4.96                     |
| lipid binding                           | >0.05                 | 2.70E-03              | NS                       | 37.91                    |
| protein binding                         | >0.05                 | 4.58E-03              | NS                       | 1.56                     |
| binding                                 | >0.05                 | 1.00E-02              | NS                       | 1.65                     |
| protein polymerization                  | 9.70E-08              | 2.57E-02              | 30.17                    | 11.89                    |
| carbohydrate metabolism                 | 1.81E-09              | >0.05                 | 19.50                    | NS                       |
| alcohol metabolism                      | 2.79E-06              | 1.44E-02              | 17.37                    | 4.13                     |
| glycolysis                              | 1.05E-06              | 5.00E-02              | 20.47                    | 7.78                     |
| gluconeogenesis                         | 1.43E-05              | >0.05                 | 32.76                    | NS                       |
| cellular metabolism                     | 2.89E-03              | >0.05                 | 1.30                     | NS                       |
| reactive oxygen species metabolism      | 1.21E-07              | >0.05                 | 20.16                    | NS                       |
| response to oxidative stress            | 2.77E-07              | >0.05                 | 25.48                    | NS                       |
| oxidoreductase activity                 | 3.54E-06              | >0.05                 | 3.82                     | NS                       |
| antioxidant activity                    | 2.46E-05              | >0.05                 | 17.16                    | NS                       |
| catalytic activity                      | 2.90E-05              | >0.05                 | 1.64                     | NS                       |
| phospholipase A2 inhibitor activity     | 1.02E-04              | >0.05                 | 168.70                   | NS                       |
| peroxidase activity                     | 1.65E-04              | >0.05                 | 17.95                    | NS                       |
| hydrolase activity                      | 2.90E-04              | >0.05                 | 2.08                     | NS                       |
| chitinase activity                      | 9.34E-04              | >0.05                 | 63.26                    | NS                       |
| glutathione transferase activity        | 5.58E-04              | >0.05                 | 18.75                    | NS                       |

NS: not significant

\*An enrichment P-value greater than 0.05 was below the significance threshold
